# Supplementary material
Source: Springer Nature journal article supplement (https://www.springermedizin.de/resource/supplementary/12958_2008_464_MOESM2_ESM.pdf/9567956)

4-5 hr

8-9 hr

IVM

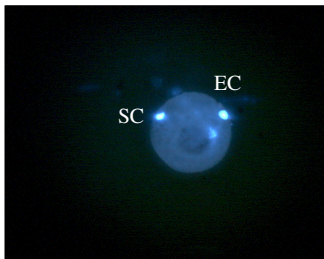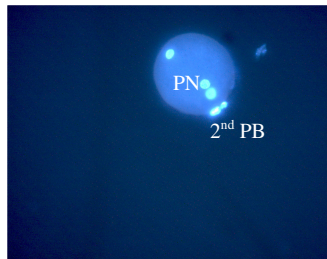

MII

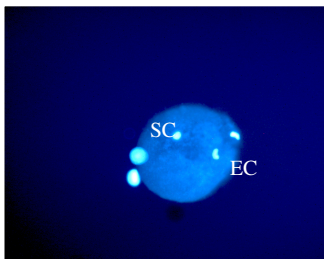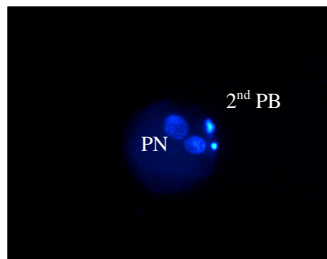

13 hr  
aged  
MII

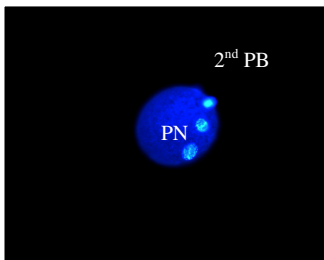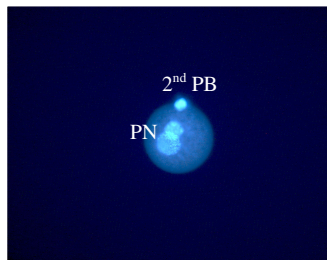

Supplement: MOESM2 [file 9567956]
